# Supplementary material for: Boosting the acetone sensing of SnS nanoflakes by spin Mn substitution: a novel adsorption–desorption perspective
Source: Royal Society of Chemistry journal article supplement (doi:10.1039/d0en01251c), 2021-01-01
Supplement: d0en01251c1.pdf [file d0en01251c1.pdf]

## Electronic supplementary information (ESI)

Yinan Bai<sup>1</sup>, Yuxiang Qin<sup>1,2,3\*</sup> and Peilun Qiu<sup>1</sup>

<sup>1</sup> School of Microelectronics, Tianjin University, Tianjin 300072, China

<sup>2</sup> Tianjin Key Laboratory of Imaging and Sensing Microelectronic Technology, Tianjin University, Tianjin 300072, China

<sup>3</sup> Key Laboratory for Advanced Ceramics and Machining Technology, Ministry of Education, School of Materials Science and Engineering, Tianjin University, Tianjin 300072, China

E-mail: qinyuxiang@tju.edu.cn

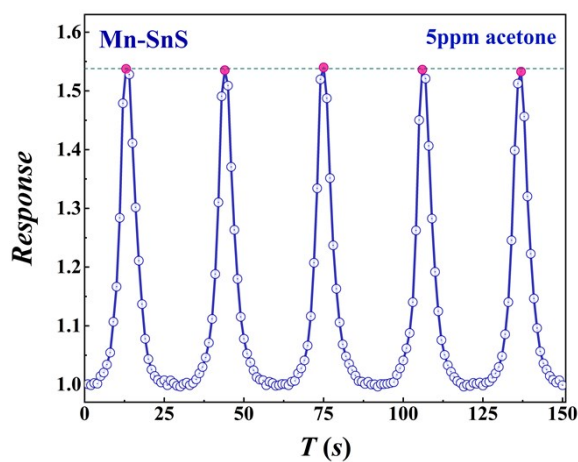

**Fig. S1** Continuous responses of the Mn-substituted SnS sensor exposure to 5 ppm acetone

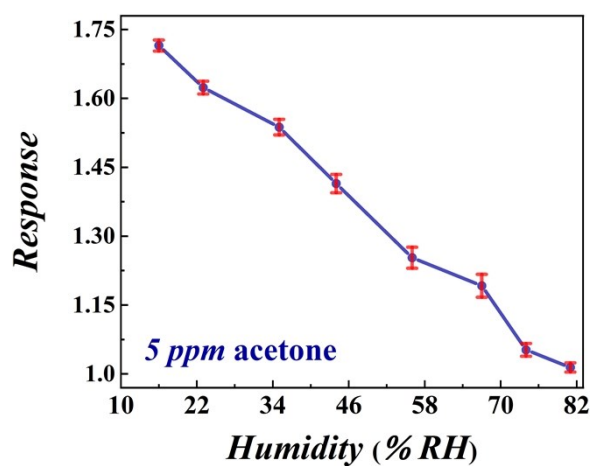

**Fig. S2** Response of Mn-SnS sensor to 5 ppm acetone with varying humidity

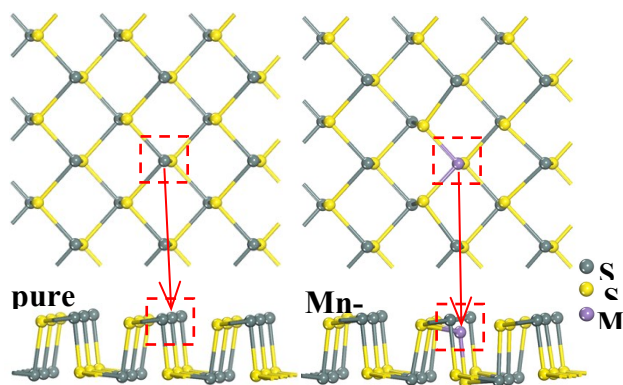

**Fig. S3** The optimal geometries of SnS and Mn-substituted SnS monolayer

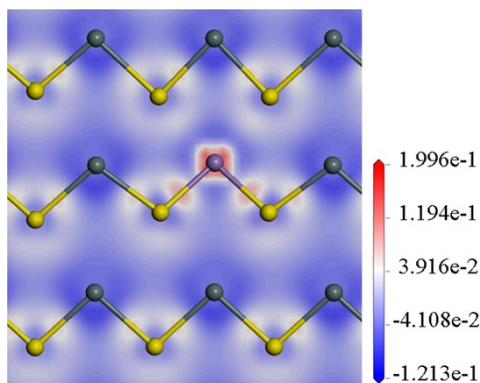

**Fig. S4** The top view of the charge density difference of Mn-substituted SnS monolayer

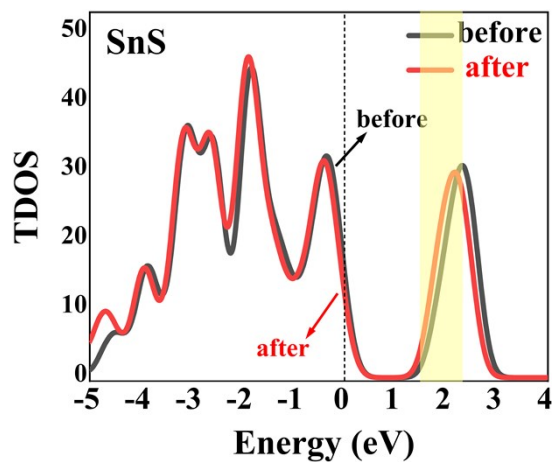

Fig. S5 TDOS of pure SnS monolayer before and after acetone adsorption

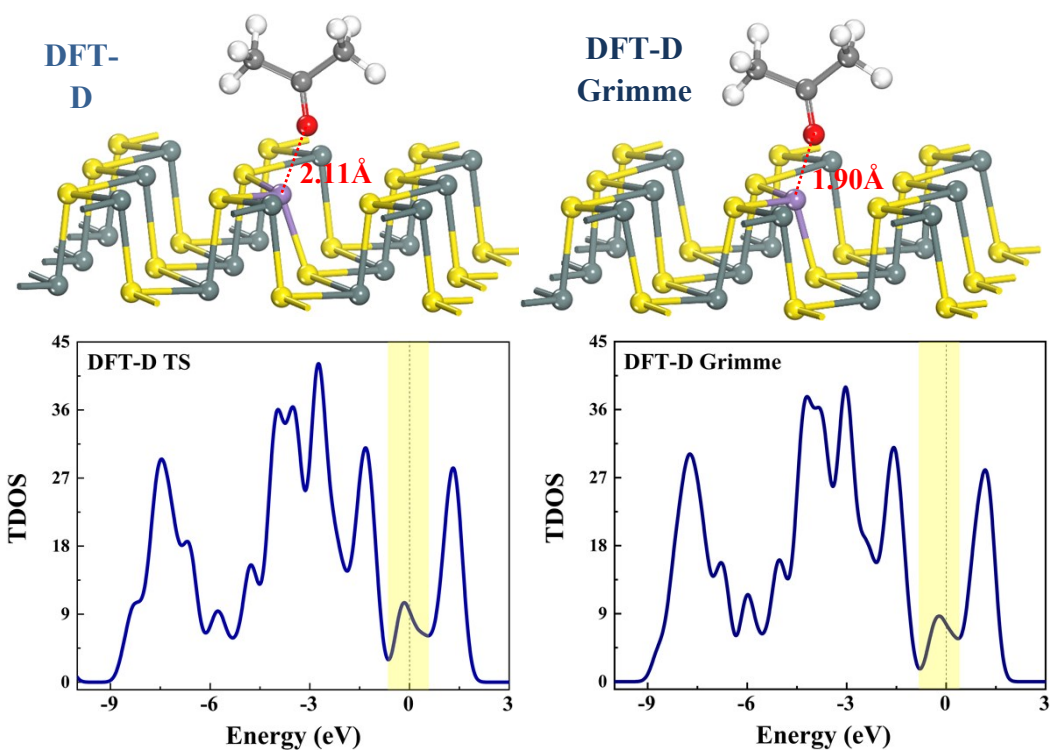

Fig. S6 The configurations and TDOS of Mn-SnS monolayer after acetone adsorption with Hubbard U and DFT-D correction (TS and Grimme)

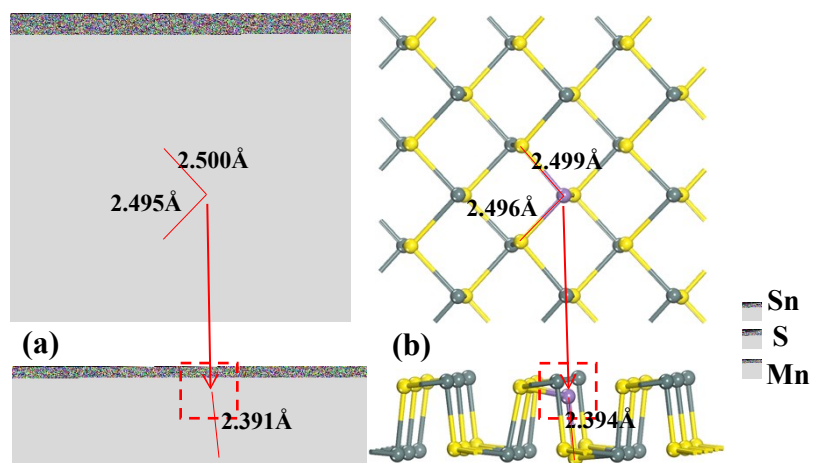

**Fig. S7** The optimal geometries of Mn-substituted SnS monolayer before adsorption (a) and after desorption (b)
